# Supplementary material
Source: PubMed Central journal article supplement (PMC4178757)
Supplement: JVI.01901-14_zjv999099598so1.pdf [file JVI.01901-14_zjv999099598so1.pdf]

Table S1 Primers used for 5'RACE, contigs authentication, and riboprobes preparation.

| Primer name                                  | Primer sequence                                          | Primer sense | Primer specific to | nt coordinates of primers |
|----------------------------------------------|----------------------------------------------------------|--------------|--------------------|---------------------------|
| <b>5'RACE</b>                                |                                                          |              |                    |                           |
| HPV-1 5'RACE-GSP-1                           | 5' GAGTTGATTAAGGCAACGCTAGAA 3'                           | Minus-sense  | RNA 1              | 532 to 509                |
| HPV-1 5'RACE-GSP-2                           | 5' GTGAAAGTATCCCGAGTGATGGGAGT 3'                         | Minus-sense  | RNA 1              | 441 to 416                |
| HPV-2 5'RACE-GSP-1                           | 5' CTTACAGATCCAGGACTTATGTCAAT 3'                         | Minus-sense  | RNA 2              | 517 to 492                |
| HPV-2 5'RACE-GSP-2                           | 5' CAGACAAACCAACAGGCACAATTAC 3'                          | Minus-sense  | RNA 2              | 454 to 429                |
| HPV-3 5'RACE-GSP 1                           | 5' GAGTTAAAGGTCAAATATGAGCATGA 3'                         | Minus-sense  | RNA 3              | 628 to 603                |
| HPV-3 5'RACE-GSP2                            | 5' GTGGCACCTATGGTCAGACAAAGTC 3'                          | Minus-sense  | RNA 3              | 592 to 569                |
| HPV-4 5'RACE-GSP 1                           | 5' GAATAGAGGAAGTAAATGACATAG 3'                           | Minus-sense  | RNA 4              | 537 to 514                |
| HPV-4 5'RACE-GSP2                            | 5' CAGATTAAGTATTTTATCCTATAAGTTC 3'                       | Minus-sense  | RNA 4              | 465 to 438                |
| HPV-5 5'RACE-GSP-1                           | 5' CAATCAGTACCGCAGATTTAAACAA 3'                          | Minus-sense  | RNA 5              | 593 to 570                |
| HPV-5 5'RACE-GSP-2                           | 5' GAATATATCGGAGACCGTTAGAGATGG 3'                        | Minus-sense  | RNA 5              | 508 to 482                |
| HPV-6 5'RACE-GSP-1                           | 5' AGAAGTCAGAGCAGTGAATGTAATA 3'                          | Minus-sense  | RNA 6              | 462 to 438                |
| HPV-6 5'RACE-GSP-2                           | 5' GTGAGGAAGCATTCAAGACTGGA 3'                            | Minus-sense  | RNA 6              | 274 to 252                |
| HPV-7 5'RACE-GSP-1                           | 5' TCGGATCTGTTGAAATGGACTAC 3'                            | Minus-sense  | RNA 7              | 509 to 487                |
| HPV-7 5'RACE-GSP-2                           | 5' GATCAATATGGCAAGTGCAGAGAAT 3'                          | Minus-sense  | RNA 7              | 453 to 429                |
| HPV-8 5'RACE-GSP-1                           | 5' CATAAAATCCA AAAATCATCAT 3'                            | Minus-sense  | RNA 8              | 410 to 399                |
| HPV-8 5'RACE-GSP-2                           | 5' TCATCATCATTACAAAATTGTAC 3'                            | Minus-sense  | RNA 8              | 393 to 371                |
| <b>Contigs 19, 29, and 12 authentication</b> |                                                          |              |                    |                           |
| H-9                                          | 5' GTGTCCATCACCTGAAGAACTTA 3'                            | Plus-sense   | RNA 6              | 60 to 82                  |
| H-10                                         | 5' CAGGAGAAGTTTGATGATGTTGATG 3'                          | Minus-sense  | RNA 6              | 662 to 638                |
| H-15                                         | 5' ATCAAGAGCGATAGGAGGATTG 3'                             | Plus-sense   | RNA 6              | 984 to 1005               |
| H-16                                         | 5' GGGAGAGGATCTAAAGAGTGATG 3'                            | Minus-sense  | RNA 6              | 1482 to 1459              |
| H-1                                          | 5' TTCTCTGCACTTGCCATATTGATCTTG 3'                        | Plus-sense   | RNA 7              | 430 to 456                |
| H-4                                          | 5' TGACAGTGATGATGATTTGAAACAGA 3'                         | Minus-sense  | RNA 7              | 1153 to 1127              |
| H-3                                          | 5' CCAAACCAGCCAGTGGAAATATTCATCA 3'                       | Plus-sense   | RNA 7              | 656 to 682                |
| H-2                                          | 5' TTTGTGAGCAGGCTGAATCTGACAGTG 3'                        | Minus-sense  | RNA 7              | 1172 to 1146              |
| H-5                                          | 5' CTTGACCTATTGTTGACATTCT 3'                             | Plus-sense   | RNA 8              | 736 to 759                |
| H-8                                          | 5' CATCTGTGCAAGCACGTAATAA 3'                             | Minus-sense  | RNA 8              | 1275 to 1253              |
| H-7                                          | 5' CAGGTTGTTGTTTGTGCATACG 3'                             | Plus-sense   | RNA 8              | 814 to 835                |
| H-6                                          | 5' CATCAGTGAATTGGAGAAGAATGTAG 3'                         | Minus-sense  | RNA 8              | 1223 to 1198              |
| HPV-R                                        | 5' AACAATGACATAGCAATTACCTCAGCA 3'                        | Plus-sense   | RNA 3              | 648 to 674                |
| HPV-F                                        | 5' GATGGCTGGCACATAGTTGTTGCATA 3'                         | Minus-sense  | RNA 3              | 1057 to 1032              |
| <b>Riboprobes preparation</b>                |                                                          |              |                    |                           |
| H-28                                         | 5' GGATTTAGGTGACACTATAGGCTCGAGTGTGAATCCAGAGGTGTTGTA 3'   | Plus-sense   | RNA 1              | 6319 to 6340              |
| H-29                                         | 5' GGTAATACGACTCACTATAGGCCATGGTTCCAACCCTGCTAAGAAGAAG 3'  | Minus-sense  | RNA 1              | 6887 to 6866              |
| H-30                                         | 5' GGATTTAGGTGACACTATAGGCTCGAGCCACATGAGGCACAGACATAAG 3'  | Plus-sense   | RNA 2              | 1135 to 1156              |
| H-31                                         | 5' GGTAATACGACTCACTATAGGCCATGGTCAACTGCTGTGGGAACAA 3'     | Minus-sense  | RNA 2              | 1816 to 1798              |
| H-32                                         | 5' GGATTTAGGTGACACTATAGGCTCGAGCCCTATGCTTGATCTGTCCCTT 3'  | Plus-sense   | RNA 3              | 470 to 491                |
| H-33                                         | 5' GGTAATACGACTCACTATAGGCCATGGTCGTCGGTTGATGGTTTCTC 3'    | Minus-sense  | RNA 3              | 1099 to 1080              |
| H-34                                         | 5' GGATTTAGGTGACACTATAGGCTCGAGCAATGAAGGTCTGGAGCTGAT 3'   | Plus-sense   | RNA 4              | 757 to 777                |
| H-35                                         | 5' GGTAATACGACTCACTATAGGCCATGGAGGCAGTTGTTAATGGTTTG 3'    | Minus-sense  | RNA 4              | 1407 to 1387              |
| H-36                                         | 5' GGATTTAGGTGACACTATAGGCTCGAGCATGTCATCACCCCTCAACTTA 3'  | Plus-sense   | RNA 5              | 892 to 912                |
| H-37                                         | 5' GGTAATACGACTCACTATAGGCCATGGCCTATACCAAGAAGCACTC 3'     | Minus-sense  | RNA 5              | 1350 to 1330              |
| H-42                                         | 5' GGATTTAGGTGACACTATAGGCTCGAGAGGTGGAAATTCACGCCTGG 3'    | Plus-sense   | RNA 6              | 231 to 250                |
| H-43                                         | 5' GGTAATACGACTCACTATAGGCCATGGGCATTGACTTTGCTCGTGACA 3'   | Minus-sense  | RNA 6              | 1201 to 1181              |
| H-38                                         | 5' GGATTTAGGTGACACTATAGGCTCGAGGTTTGTACCAAACAGCCAG 3'     | Plus-sense   | RNA 7              | 648 to 668                |
| H-39                                         | 5' GGTAATACGACTCACTATAGGCCATGGAGCAGGCTGAATCTGACAGTG 3'   | Minus-sense  | RNA 7              | 1166 to 1146              |
| H-40                                         | 5' GGATTTAGGTGACACTATAGGCTCGAGTTACCGATGTGATGACTGTGGG 3'  | Plus-sense   | RNA 8              | 679 to 697                |
| H-41                                         | 5' GGTAATACGACTCACTATAGGCCATGGAACCGTCATCATCAGTGAATTGG 3' | Minus-sense  | RNA 8              | 1232 to 1210              |

XhoI and BamHI restriction sites in the plus- and minus-sense primers used for riboprobes preparation are indicated with bold and bold-italics, respectively.

SP6 and T7 RNA polymerase promoter sequences in the plus- and minus-sense primers used for riboprobes preparation are indicated with italics and italics-underlined, respectively.
